# Supplementary material
Source: PubMed Central journal article supplement (PMC9003389)
Supplement: pt2c00026_si_001.pdf [file pt2c00026_si_001.pdf]

**Supporting Information:**  
**Hit expansion of a non-covalent SARS-CoV-2**  
**main protease inhibitor**

Jens Glaser,<sup>\*,†</sup> Ada Sedova,<sup>†</sup> Stephanie Galanie,<sup>†,¶</sup> Daniel W. Kneller,<sup>†,§</sup> Russell  
B. Davidson,<sup>†</sup> Elvis Maradzike,<sup>†</sup> Sara Del Galdo,<sup>‡</sup> Audrey Labbé,<sup>†</sup> Darren J.  
Hsu,<sup>†</sup> Rupesh Agarwal,<sup>†</sup> Dmytro Bykov,<sup>†</sup> Arnold Tharrington,<sup>†</sup> Jerry M. Parks,<sup>†</sup>  
Dayle M. A. Smith,<sup>†</sup> Isabella Daidone,<sup>‡</sup> Leighton Coates,<sup>†</sup> Andrey Kovalevsky,<sup>†</sup>  
and Jeremy C. Smith<sup>\*,†</sup>

<sup>†</sup>*Oak Ridge National Laboratory, 1 Bethel Valley Rd, Oak Ridge, TN 37830, USA*

<sup>‡</sup>*Department of Physical and Chemical Sciences, University of L'Aquila, I-67010 L'Aquila,  
Italy*

<sup>¶</sup>*Protein Engineering, Merck, 126 East Lincoln Avenue, RY800-C303, Rahway, NJ 07065,  
USA*

<sup>§</sup>*New England Biolabs, 240 County Rd, Ipswich, MA 01938, USA*

E-mail: glaserj@ornl.gov; smithjc@ornl.gov

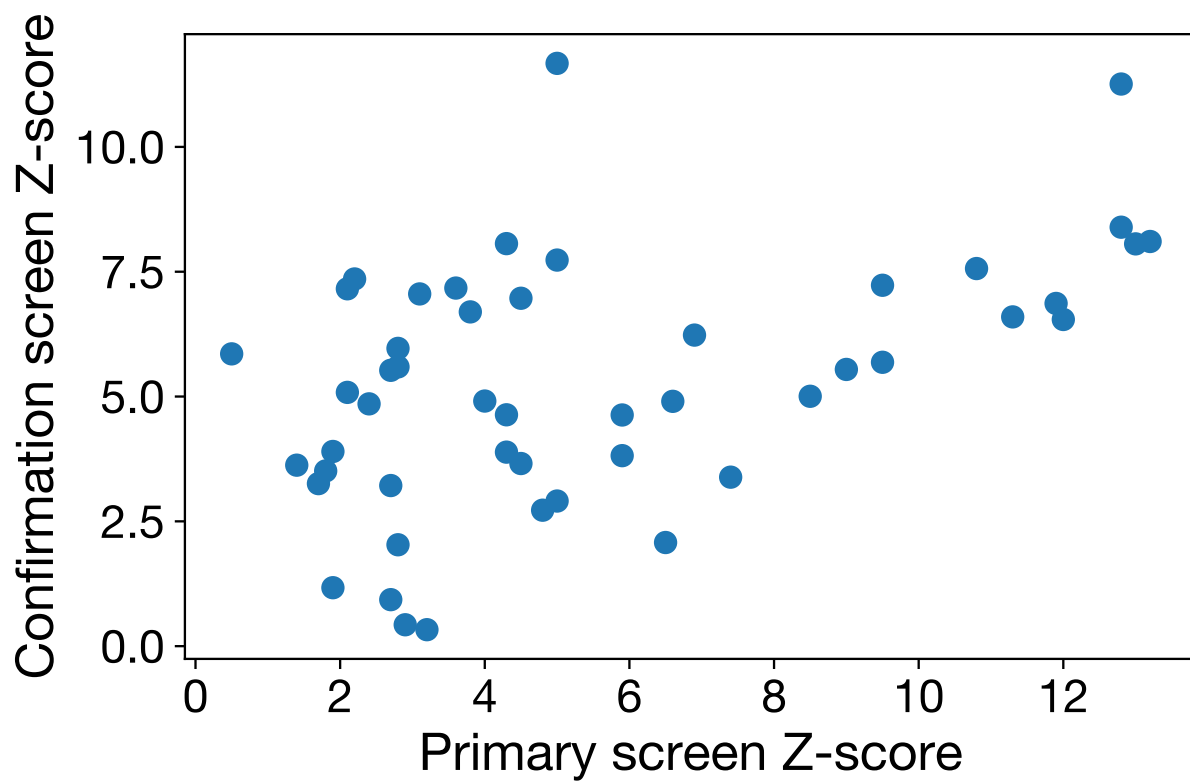

Figure S1: Validation of the enzymatic assay. Affinity data (Z-scores) for M<sup>pro</sup> inhibitors at 20  $\mu$ M for confirmation screen *vs.* primary screen.

Table S1: Crystallographic data collection and refinement statistics for room-temperature structures of M<sup>pro</sup> in complex with compound 12, compound 19, and compound 21. Values in parenthesis indicate highest resolution shell.

| PDB ID                            | M <sup>pro</sup> - <b>compound 12</b><br>7S3K | M <sup>pro</sup> - <b>compound 19</b><br>7S4B | M <sup>pro</sup> - <b>compound 21</b><br>7S3S |
|-----------------------------------|-----------------------------------------------|-----------------------------------------------|-----------------------------------------------|
| Data Collection:                  | X-ray (in-house)                              |                                               |                                               |
| Diffractometer                    | Rigaku HighFlux Eiger R 4M                    |                                               |                                               |
| Space group                       | I2                                            | I2                                            | I2                                            |
| Wavelength (Å)                    | 1.5406                                        | 1.5406                                        | 1.5406                                        |
| Cell dimensions:                  |                                               |                                               |                                               |
| a, b, c (Å)                       | 45.23, 54.59, 114.99                          | 45.37, 54.41, 114.28                          | 45.66, 54.72, 114.97                          |
| $\alpha$ , $\beta$ , $\gamma$ (°) | 90, 101.17, 90                                | 90, 101.00, 90                                | 90, 101.44, 90                                |
| Resolution (Å)                    | 56.41 – 1.90<br>(1.97-1.90)                   | 56.09 – 2.00<br>(2.07-2.00)                   | 56.33 – 2.00<br>(2.07-2.00)                   |
| No. of reflections unique         | 21 813 (2174)                                 | 18 177 (1770)                                 | 18 686 (1834)                                 |
| $R_{\text{merge}}$                | 0.078 (0.498)                                 | 0.078 (0.438)                                 | 0.059 (0.552)                                 |
| $R_{\text{pim}}$                  | 0.040 (0.282)                                 | 0.045 (0.241)                                 | 0.030 (0.281)                                 |
| CC <sub>1/2</sub>                 | 0.986 (0.762)                                 | 0.992 (0.806)                                 | 0.991 (0.728)                                 |
| $I/\sigma_I$                      | 13.39 (1.73)                                  | 12.51 (1.92)                                  | 18.40 (1.98)                                  |
| Completeness (%)                  | 99.9 (99.5)                                   | 97.5 (95.0)                                   | 98.6 (96.6)                                   |
| Redundancy                        | 5.0 (4.0)                                     | 4.1 (4.2)                                     | 4.6 (4.6)                                     |
| <b>Refinement:</b>                |                                               |                                               |                                               |
| $R_{\text{work}}/R_{\text{free}}$ | 0.1751 / 0.2039                               | 0.1717 / 0.2098                               | 0.1832 / 0.2220                               |
| B-factors                         |                                               |                                               |                                               |
| Protein                           | 36.43                                         | 37.87                                         | 42.76                                         |
| Ligand                            | 31.08                                         | 34.55                                         | 35.23                                         |
| Water                             | 40.65                                         | 42.44                                         | 43.71                                         |
| R.M.S. deviations                 |                                               |                                               |                                               |
| Bond lengths (Å)                  | 0.003                                         | 0.005                                         | 0.003                                         |
| Bond angles (°)                   | 0.591                                         | 0.743                                         | 0.650                                         |
| All atom clashscore               | 0.84                                          | 0.00                                          | 0.21                                          |

Table S2: List of M<sup>Pro</sup> crystal structures (PDB IDs) used for the hydration analysis.

5R7Z, 5R80, 5RE4, 5RE5, 5RE6, 5RE7, 5RE8, 5RE9, 5REA, 5REB, 5REC, 5RED, 5REE, 5REF, 5REG, 5REH, 5REI, 5REJ, 5REK, 5REL, 5REM, 5REN, 5REO, 5REP, 5RER, 5RES, 5RET, 5REU, 5REV, 5REW, 5REX, 5REY, 5REZ, 5RF0, 5RF1, 5RF2, 5RF3, 5RF4, 5RF5, 5RF6, 5RF7, 5RF8, 5RF9, 5RFB, 5RFC, 5RFD, 5RFE, 5RFF, 5RFG, 5RFH, 5RFI, 5RFJ, 5RFK, 5RFL, 5RFM, 5RFN, 5RFO, 5RFP, 5RFQ, 5RFR, 5RFS, 5RFT, 5RFU, 5RFV, 5RFW, 5RFX, 5RFY, 5RFZ, 5RG1, 5RG2, 5RG3, 5RGG, 5RGH, 5RGJ, 5RGK, 5RGL, 5RGN, 5RGO, 5RGP, 5RGQ, 5RGR, 5RGS, 5RGT, 5RGU, 5RGV, 5RGW, 5RGX, 5RGY, 5RGZ, 5RH1, 5RH2, 5RH3, 5RH4, 5RH5, 5RH6, 5RH7, 5RH8, 5RH9, 5RHA, 5RL0, 5RL1, 5RL2, 5RL3, 5RL4, 5RL5, 6LU7, 6LZE, 6M03, 6M0K, 6M2N, 6M2Q, 6W63, 6WNP, 6WQF, 6WTJ, 6WTK, 6WTM, 6WTT, 6XB0, 6XB1, 6XB2, 6XBG, 6XBI, 6XCH, 6XFN, 6XG2, 6XHU, 6XKF, 6XKH, 6XOA, 6XQS, 6XQT, 6XQU, 6XR3, 6Y2E, 6Y2F, 6Y2G, 6YB7, 6YNQ, 6YT8, 6YVF, 6YZ6, 6ZRT, 7A1U, 7AEG, 7AF0, 7AGA, 7AHA, 7ALH, 7ALI, 7AMJ, 7ANS, 7AOL, 7AP6, 7AQE, 7AQI, 7AQJ, 7AR5, 7AR6, 7AVD, 7AWR, 7AWS, 7AWU, 7AWW, 7AX6, 7AXM, 7AXO, 7AY7, 7B3E, 7B83, 7BAJ, 7BB2, 7BE7, 7BFB, 7BGP, 7BQY, 7BRO, 7BRP, 7BRR, 7BUY, 7C2Q, 7C2Y, 7C7P, 7C8R, 7C8T, 7CB7, 7COM, 7CUU, 7CWB, 7D1M, 7D1O, 7D3I, 7DJR, 7DK1, 7DPU, 7DPV, 7JFQ, 7JKV, 7JOX, 7JOY, 7JP1, 7JPY, 7JPZ, 7JQ0, 7JQ1, 7JQ2, 7JQ3, 7JQ4, 7JQ5, 7JST, 7JT7, 7JU7, 7JUN, 7JVZ, 7JW8, 7JYC, 7K0F, 7K3T, 7K40, 7K6D, 7K6E, 7KFI, 7KFJ, 7KHP, 7KPH, 7KVG, 7KVL, 7KVR, 7KW5, 7L0D, 7LB7, 7LBN, 7LCO, 7LCS, 7LCT, 7LDX, 7LFE, 7LKD, 7LKR, 7LKS, 7LMC, 7LTJ, 7LYH, 7LYI, 7LZT, 7LZX, 7MBG, 7MGS, 7MHF, 7MHG, 7MHH, 7MHI, 7MHJ, 7MHK, 7MHL, 7MHM, 7MHN, 7MHO, 7MHP, 7MHQ, 7MNG, 7MPB, 7MRR, 7N5Z, 7N6N, 7N89, 7N8C, 7NBY, 7NF5, 7NG3, 7NG6, 7NT1, 7NT2, 7NT3, 7NTV, 7NUK, 7NW2, 7S3K, 7S3S, and 7S4B
